# Supplementary material for: The Effect of Organic Trace Mineral Supplementation in the Form of Proteinates on Performance and Sustainability Parameters in Laying Hens: A Meta-Analysis
Source: MDPI journal article supplement (doi:10.3390/ani13193132), 2023-10-07
Supplement: s1 [file s1]

**Table S1.** Ingredient composition of formulated low- and high-soybean meal (SBM) diets in different laying phases

| Ingredient (%)              | Low-SBM diet |           |         |          | High-SBM diet |           |         |          |
|-----------------------------|--------------|-----------|---------|----------|---------------|-----------|---------|----------|
|                             | Pre-lay      | Early-lay | Mid-lay | Late-lay | Pre-lay       | Early-lay | Mid-lay | Late-lay |
| Wheat                       | 62.53        | 54.75     | 59.49   | 62.36    | 62.53         | 53.66     | 58.07   | 62.36    |
| Wheat feed                  | 10.00        | 10.00     | 10.00   | 10.00    | 10.00         | 6.47      | 10.00   | 10.00    |
| Soybean meal <sup>1</sup>   | 15.21        | 15.34     | 6.52    | 3.60     | 15.21         | 24.35     | 9.35    | 3.60     |
| Sunflower meal <sup>2</sup> | 5.00         | 5.80      | 10.00   | 10.00    | 5.00          | -         | 8.25    | 10.00    |
| Soybean oil                 | 1.13         | 3.59      | 3.55    | 3.32     | 1.13          | 3.66      | 3.60    | 3.32     |
| Limestone                   | 4.13         | 8.81      | 8.93    | 9.27     | 4.13          | 9.75      | 9.17    | 9.27     |
| Monocalcium phosphate       | 1.00         | 0.70      | 0.47    | 0.37     | 1.00          | 0.96      | 0.53    | 0.37     |
| Sodium chloride             | 0.26         | 0.26      | 0.21    | 0.21     | 0.26          | 0.29      | 0.24    | 0.21     |
| Sodium bicarbonate          | 0.15         | 0.15      | 0.15    | 0.15     | 0.15          | 0.17      | 0.15    | 0.15     |
| Lysine-HCl                  | 0.02         | -         | 0.09    | 0.14     | 0.02          | -         | 0.06    | 0.14     |
| DL-methionine               | 0.05         | 0.09      | 0.06    | 0.05     | 0.05          | 0.18      | 0.07    | 0.05     |
| Synergen                    | 0.02         | 0.01      | 0.01    | 0.01     | 0.02          | 0.02      | 0.02    | 0.01     |
| Vitamin-mineral premix      | 0.50         | 0.50      | 0.50    | 0.50     | 0.50          | 0.50      | 0.50    | 0.50     |
| Total                       | 100          | 100       | 100     | 100      | 100           | 100       | 100     | 100      |

<sup>1</sup>Soybean meal contains 46.5% crude protein.<sup>2</sup>Sunflower meal contains 36% crude protein.

**Table S2.** Summary of daily feed intake, crude protein content and estimated global warming potential (GWP) of formulated low- and high-soybean meal (SBM) diets

| Diet      | Low-SBM diet               |                      |                                   | High-SBM diet              |                      |                                   |
|-----------|----------------------------|----------------------|-----------------------------------|----------------------------|----------------------|-----------------------------------|
|           | Feed intake<br>(g/day/hen) | Crude<br>protein (%) | GWP<br>(g CO <sub>2</sub> -eq/kg) | Feed intake<br>(g/day/hen) | Crude<br>protein (%) | GWP<br>(g CO <sub>2</sub> -eq/kg) |
| Pre-lay   | 100                        | 17.5                 | 1027                              | 100                        | 17.5                 | 1027                              |
| Early-lay | 110                        | 17.0                 | 1060                              | 100                        | 18.5                 | 1485                              |
| Mid-lay   | 120                        | 15.0                 | 649                               | 115                        | 15.5                 | 780                               |
| Late-lay  | 120                        | 14.0                 | 508                               | 120                        | 14.0                 | 508                               |

**Table S3.** Data describing production characteristics and laying performance of baseline and organic trace mineral (OTM, Bioplex Cu, Fe, Mn, Zn) scenarios

| Item                        | Baseline | OTM   |
|-----------------------------|----------|-------|
| Laying cycle (week)         | 62       | 62    |
| Hen-day production (%)      | 85       | 87    |
| Eggs produced per bird (n)  | 369      | 378   |
| Egg weight (g)              | 65       | 65.5  |
| Total egg mass per hen (kg) | 23.99    | 24.73 |
| Mortality (%)               | 3.50     | 3.50  |
| Egg loss (%)                | 1.5      | 0.9   |
| Total feed per hen (kg)     | 50.35    | 49.13 |
| FCR (g feed/kg egg)         | 2100     | 2049  |
